# Supplementary material
Source: publisher figshare collection journal article supplement (https://geolsoc.figshare.com/ndownloader/files/26130779)
Supplement: Supplementary file 1 [file 26130779]

## Sheet: Planilha1
Table S2: Major elements of the samples analyzed by X-ray Fluorescence. Values in percentage
Sample/analysis	SiO2	TiO2	Al2O3	Fe2O3	MnO	MgO	CaO	Na2O	K2O	P2O5	LoI	Total
UN-02B	66.69	0.9	15.54	5.54	0.031	1.67	0.04	0.94	2.93	0.093	4.743	99.117
UN-03A	63.07	0.866	18.17	4.1	0.017	1.44	0.08	0.01	8.63	0.05	2.91971	99.3527
UN-04	62.98	0.838	17.73	4.71	0.019	1.4	0.19	0.24	6.46	0.043	4.06465	98.6747
UN-14	59	0.862	15.92	10.2	0.021	1.86	0.02	0.02	7.71	0.063	3.52754	99.2035
UN-33A 1	70.92	0.58	13.7	4.35	0.038	1.1	0.16	2.13	2	0.028	3.77661	98.7826
UN-33A 2	71.07	0.586	13.71	4.34	0.034	1.11	0.16	2.15	2.02	0.026	3.77591	98.9819
UN-33B	73.56	0.671	11.79	3.99	0.044	1.18	0.46	2.39	1.83	0.179	2.92994	99.0239
